# Supplementary material for: Effects of particulate matter on inflammatory markers in the general adult population
Source: PubMed Central journal article supplement (PMC3464812; doi:10.1186/1743-8977-9-24), 2012-07-06
Supplement: 1743-8977-9-24-S1.pdf [file 1743-8977-9-24-S1.pdf]

## Supplementary materials

### Effects of particulate **matter** on inflammatory markers in the general adult population

Dai-Hua Tsai<sup>1,2</sup>, Nadia Amyai<sup>3</sup>, Pedro Marques-Vidal<sup>1</sup>, Jia-Lin Wang<sup>2</sup>, Michael Riediker<sup>4</sup>, Vincent Mooser<sup>5</sup>, Fred Paccaud<sup>1</sup>, Gerard Waeber<sup>3</sup>, Peter Vollenweider<sup>3</sup>, Murielle Bochud<sup>1§</sup>

<sup>1</sup>Institute of Social and Preventive Medicine (IUMSP), Lausanne University Hospital (CHUV), Lausanne, Switzerland

<sup>2</sup>Department of Chemistry, National Central University, Taiwan

<sup>3</sup>Department of Medicine, Internal Medicine, CHUV, Lausanne, Switzerland

<sup>4</sup>Institute for Work and Health (IST), Lausanne, Switzerland

<sup>5</sup>Department of Genetics, GlaxoSmithKline, Philadelphia, PA, USA

**Supplementary Material, Table 1. Levels of inflammatory markers overall and by selected subgroups**

|                     | hs-CRP (µg/mL)     |      | IL-1β (pg/mL)       |      | IL-6 (pg/mL)        |      | TNF-α (pg/mL)       |      |                     |
|---------------------|--------------------|------|---------------------|------|---------------------|------|---------------------|------|---------------------|
|                     | Subjects<br>[n(%)] | N    | Median<br>(P25-P75) | N    | Median<br>(P25-P75) | N    | Median<br>(P25-P75) | N    | Median<br>(P25-P75) |
| <b>All subjects</b> | 6183               | 6171 | 1.30(0.60-2.70)     | 3794 | 1.17(0.48-3.90)     | 5626 | 1.47(0.71-3.52)     | 6034 | 2.89(1.82-4.52)     |
| <b>Sex</b>          |                    |      |                     |      |                     |      |                     |      |                     |
| Female              | 3251(52.6)         | 3247 | 1.30(0.60-2.90)     | 2049 | 1.28(0.52-3.76)     | 2933 | 1.37(0.67-3.22)     | 3172 | 2.75(1.72-4.40)     |
| Male                | 2932(47.4)         | 2924 | 1.20(0.60-2.60)     | 1745 | 1.08(0.45-3.96)     | 2693 | 1.59(0.77-3.79)     | 2862 | 3.05(1.90-4.65)     |
| p-value             |                    |      | 0.01                |      | 0.04                |      | <0.01               |      | <0.01               |
| <b>Age (Years)</b>  |                    |      |                     |      |                     |      |                     |      |                     |
| <55                 | 3506(56.7)         | 3500 | 1.00(0.50-2.40)     | 2274 | 1.29(0.51-4.16)     | 3140 | 1.39(0.67-3.53)     | 3414 | 2.71(1.71-4.27)     |
| ≥55                 | 2677(43.3)         | 2671 | 1.60(0.80-3.20)     | 1520 | 1.05(0.45-3.42)     | 2486 | 1.60(0.78-3.47)     | 2620 | 3.15(2.01-4.83)     |
| p-value             |                    |      | <0.01               |      | <0.01               |      | <0.01               |      | <0.01               |
| <b>BMI</b>          |                    |      |                     |      |                     |      |                     |      |                     |
| <25                 | 2970(48.0)         | 2963 | 0.80(0.40-1.70)     | 1872 | 1.32(0.53-4.09)     | 2648 | 1.35(0.64-3.45)     | 2896 | 2.70(1.71-4.21)     |
| ≥25                 | 3213(52.0)         | 3208 | 1.90(0.90-3.80)     | 1922 | 1.05(0.45-3.64)     | 2978 | 1.59(0.80-3.53)     | 3183 | 3.11(1.93-4.82)     |
| p-value             |                    |      | <0.01               |      | <0.01               |      | <0.01               |      | <0.01               |
| <b>Smoking</b>      |                    |      |                     |      |                     |      |                     |      |                     |
| No                  | 4510(72.9)         | 4506 | 1.20(0.60-2.70)     | 2763 | 1.14(0.48-3.79)     | 4083 | 1.38(0.67-3.30)     | 4412 | 2.86(1.79-4.47)     |
| Yes                 | 1673(27.1)         | 1665 | 1.40(0.70-2.90)     | 1031 | 1.27(0.49-4.46)     | 1543 | 1.72(0.86-4.02)     | 1622 | 2.99(1.87-4.79)     |
| p-value             |                    |      | <0.01               |      | 0.05                |      | <0.01               |      | 0.01                |
| <b>Diabetes</b>     |                    |      |                     |      |                     |      |                     |      |                     |
| No                  | 5764(93.2)         | 5764 | 1.20(0.60-2.60)     | 3588 | 1.19(0.49-3.91)     | 5237 | 1.45(0.70-3.46)     | 5635 | 2.86(1.79-4.48)     |
| Yes                 | 407(6.8)           | 407  | 2.10(1.00-4.50)     | 206  | 0.93(0.43-3.58)     | 388  | 1.93(0.92-3.86)     | 398  | 3.55(2.21-5.37)     |
| p-value             |                    |      | <0.01               |      | 0.17                |      | <0.01               |      | <0.01               |
| <b>Hypertension</b> |                    |      |                     |      |                     |      |                     |      |                     |
| No                  | 3960(47.9)         | 3953 | 1.10(0.50-2.30)     | 2527 | 1.23(0.50-4.09)     | 3569 | 1.37(0.66-3.39)     | 3860 | 2.74(1.72-4.30)     |
| Yes                 | 2223(52.1)         | 2218 | 1.80(0.90-3.60)     | 1267 | 1.07(0.45-3.49)     | 2057 | 1.67(0.83-3.65)     | 2174 | 3.19(2.04-4.92)     |
| p-value             |                    |      | <0.01               |      | 0.01                |      | <0.01               |      | <0.01               |
| <b>Alcohol</b>      |                    |      |                     |      |                     |      |                     |      |                     |
| No                  | 4613(74.6)         | 4606 | 1.20(0.60-2.70)     | 2875 | 1.19(0.48-3.93)     | 4183 | 1.42(0.70-3.40)     | 4505 | 2.86(1.80-4.50)     |
| Yes                 | 1567(25.4)         | 1567 | 1.40(0.70-2.70)     | 918  | 1.14(0.47-3.78)     | 1441 | 1.59(0.79-3.94)     | 1527 | 2.99(1.86-4.61)     |
| p-value             |                    |      | <0.01               |      | 0.36                |      | <0.01               |      | 0.09                |

Note: by Wilcoxon rank sum test

**Supplementary Material, Table 2. Change (and 95% CI) in inflammatory markers associated with a 10 µg/m<sup>3</sup> change in ambient 24h average PM<sub>10</sub> concentration**

|                       | <b>Crude effects</b>   | <b>p-value</b> | <b>Adjusted effects <sup>a</sup></b> | <b>p-value</b> |
|-----------------------|------------------------|----------------|--------------------------------------|----------------|
| <b>hs-CRP (µg/mL)</b> | 0.0004 (-0.016, 0.016) | 0.961          | -0.002 (-0.017, 0.013)               | 0.820          |
| <b>IL-1β (pg/mL)</b>  | 0.016 (-0.009, 0.040)  | 0.226          | 0.017 (-0.010, 0.044)                | 0.220          |
| <b>IL-6 (pg/mL)</b>   | 0.026 (0.008, 0.043)   | 0.004          | 0.023 (0.005, 0.042)                 | 0.014          |
| <b>TNF-α (pg/mL)</b>  | 0.015 (0.004, 0.025)   | 0.005          | 0.024 (0.013, 0.035)                 | <0.001         |

<sup>§</sup> Covariates included in the model: sex, age, BMI, alcohol consumption, smoking status, education levels, zip code, statin, diabetes, hypertension, season, outdoor air temperature, and outdoor air pressure. Data are coefficients from robust regression models.

**Supplementary Material, Table 3. Association of short-term exposure to 24h average PM10 with inflammatory markers on the day of examination, and with 1-day to 6-day lags from adjusted robust regression models<sup>§</sup>**

|                  | hs-CRP                    | p-value | IL-1 $\beta$             | p-value | IL-6                    | p-value | TNF- $\alpha$           | p-value |
|------------------|---------------------------|---------|--------------------------|---------|-------------------------|---------|-------------------------|---------|
| Lag 0 (Same day) | -0.002<br>(-0.017, 0.013) | 0.820   | 0.017<br>(-0.010, 0.044) | 0.220   | 0.023<br>(0.005, 0.042) | 0.014   | 0.024<br>(0.013, 0.035) | <0.001  |
| Lag 1            | 0.001<br>(-0.013, 0.016)  | 0.854   | 0.014<br>(-0.012, 0.041) | 0.290   | 0.023<br>(0.005, 0.004) | 0.013   | 0.022<br>(0.012, 0.033) | <0.001  |
| Lag 2            | 0.002<br>(-0.013, 0.017)  | 0.798   | 0.020<br>(-0.007, 0.047) | 0.146   | 0.026<br>(0.008, 0.044) | 0.005   | 0.023<br>(0.013, 0.034) | <0.001  |
| Lag 3            | -0.001<br>(-0.015, 0.014) | 0.944   | 0.017<br>(-0.010, 0.044) | 0.207   | 0.029<br>(0.011, 0.047) | 0.002   | 0.023<br>(0.012, 0.034) | <0.001  |
| Lag 4            | 0.002<br>(-0.013, 0.017)  | 0.784   | 0.017<br>(-0.009, 0.043) | 0.206   | 0.031<br>(0.012, 0.049) | 0.001   | 0.022<br>(0.011, 0.033) | <0.001  |
| Lag 5            | 0.003<br>(-0.011, 0.018)  | 0.662   | 0.017<br>(-0.010, 0.043) | 0.221   | 0.029<br>(0.010, 0.047) | 0.002   | 0.019<br>(0.008, 0.030) | 0.001   |
| Lag 6            | 0.002<br>(-0.012, 0.017)  | 0.753   | 0.013<br>(-0.013, 0.040) | 0.325   | 0.031<br>(0.013, 0.050) | 0.001   | 0.019<br>(0.008, 0.030) | 0.001   |

<sup>§</sup>Adjusted for: sex, age, BMI, alcohol consumption, smoking status, education levels, zip code, statin, diabetes, hypertension, season, outdoor air temperature, and outdoor air pressure.

**Supplementary Material, Table 4. Associations of short-term exposure to 24h average PM<sub>10</sub> with inflammatory markers, by selected strata**

|                                        | <b>hs-CRP</b>             | <b>p-value</b> | <b>IL-1<math>\beta</math></b> | <b>p-value</b> | <b>IL-6</b>              | <b>p-value</b> | <b>TNF-<math>\alpha</math></b> | <b>p-value</b> |
|----------------------------------------|---------------------------|----------------|-------------------------------|----------------|--------------------------|----------------|--------------------------------|----------------|
| <b>Female</b>                          | -0.008<br>(-0.028, 0.012) | 0.439          | 0.010<br>(-0.026, 0.046)      | 0.582          | 0.012<br>(-0.013, 0.037) | 0.354          | 0.023<br>(0.008, 0.038)        | 0.002          |
| <b>Male</b>                            | 0.009<br>(-0.013, 0.031)  | 0.416          | 0.028<br>(-0.013, 0.069)      | 0.183          | 0.038<br>(0.010, 0.066)  | 0.007          | 0.025<br>(0.009, 0.041)        | 0.002          |
| <b>Interaction p-value<sup>§</sup></b> |                           | 0.560          |                               | 0.999          |                          | 0.371          |                                | 0.627          |
| <b>Age&lt;55</b>                       | -0.007<br>(-0.027, 0.013) | 0.511          | 0.026<br>(-0.009, 0.061)      | 0.149          | 0.033<br>(0.008, 0.059)  | 0.011          | 0.027<br>(0.013, 0.042)        | <0.001         |
| <b>Age<math>\geq</math>55</b>          | 0.007<br>(-0.015, 0.029)  | 0.527          | 0.004<br>(-0.039, 0.046)      | 0.866          | 0.013<br>(-0.014, 0.040) | 0.360          | 0.020<br>(0.003, 0.037)        | 0.021          |
| <b>Interaction p-value<sup>§</sup></b> |                           | 0.404          |                               | 0.315          |                          | 0.079          |                                | 0.624          |
| <b>Healthy<sup>†</sup></b>             | 0.025<br>(-0.009, 0.058)  | 0.151          | 0.048<br>(-0.017, 0.112)      | 0.150          | 0.062<br>(0.015, 0.108)  | 0.009          | 0.035<br>(0.009, 0.061)        | 0.009          |
| <b>Non-healthy<sup>†</sup></b>         | -0.007<br>(-0.024, 0.009) | 0.400          | 0.012<br>(-0.018, 0.041)      | 0.437          | 0.014<br>(-0.006, 0.034) | 0.175          | 0.022<br>(0.010, 0.034)        | <0.001         |
| <b>Interaction p-value<sup>§</sup></b> |                           | 0.620          |                               | 0.331          |                          | 0.391          |                                | 0.778          |
| <b>No statins</b>                      | -0.002<br>(-0.018, 0.014) | 0.806          | 0.007<br>(-0.022, 0.036)      | 0.645          | 0.023<br>(0.003, 0.043)  | 0.027          | 0.024<br>(0.012, 0.036)        | <0.001         |
| <b>With statins</b>                    | 0.006<br>(-0.036, 0.049)  | 0.773          | 0.083<br>(0.004, 0.161)       | 0.040          | 0.031<br>(-0.017, 0.081) | 0.196          | 0.020<br>(-0.011, 0.051)       | 0.200          |
| <b>Interaction p-value<sup>§</sup></b> |                           | 0.843          |                               | 0.130          |                          | 0.699          |                                | 0.809          |

Data are coefficients (95% CI) from robust regression models. Coefficients represent change in cytokine per 10  $\mu\text{g}/\text{m}^3$  increase in PM<sub>10</sub>. <sup>§</sup> P-value for interaction between the strata variable and PM<sub>10</sub> for their effects on the inflammatory marker.

<sup>†</sup> Sample sizes for healthy and non-healthy are 993 and 5190, respectively.
